# Supplementary material for: Development and Implementation of Pediatric ICU-based Mobility Guidelines: A Quality Improvement Initiative
Source: PubMed Central journal article supplement — Pediatr Qual Saf. 2021 May 19;6(3):e414. doi: 10.1097/pq9.0000000000000414 (PMC8143751; doi:10.1097/pq9.0000000000000414), 2021-05-19
Supplement: pqs-6-e414-s001.pdf [file pqs-6-e414-s001.pdf]

**Supplemental Table 1.** Classification of active and passive physical therapies and occupational therapies

|                                                                            |                                                                                                                                                                                                                                                                                                                                                                                                                                                                    |                                        |
|----------------------------------------------------------------------------|--------------------------------------------------------------------------------------------------------------------------------------------------------------------------------------------------------------------------------------------------------------------------------------------------------------------------------------------------------------------------------------------------------------------------------------------------------------------|----------------------------------------|
| Physical Therapy                                                           |                                                                                                                                                                                                                                                                                                                                                                                                                                                                    |                                        |
| Passive Therapies                                                          | Active Therapies                                                                                                                                                                                                                                                                                                                                                                                                                                                   |                                        |
| Splinting<br>Positioning<br>Passive Range of Motion                        | Active range of motion<br>In-bed mobility<br>Side-of-bed sitting<br>Strengthening exercises<br>Transfers<br>Out-of-bed sitting<br>Righting and balance skills<br>Pre-gait skills<br>Ambulation                                                                                                                                                                                                                                                                     |                                        |
| Occupational Therapy                                                       |                                                                                                                                                                                                                                                                                                                                                                                                                                                                    |                                        |
| Passive therapies                                                          | Active therapies                                                                                                                                                                                                                                                                                                                                                                                                                                                   | Feeding skills                         |
| Splinting<br>Positioning<br>Passive Range of Motion<br>Sensory stimulation | Active range of motion<br>Bed mobility<br>Transfers<br>Activities of daily living skills according to patient care plan developed during assessment including toileting, dressing and grooming<br>Independent activities of daily living skills including meal prep, executive functioning when planning to complete a task, object retrieval for completion of functional activity, and leisure activities (video games, board games and crafts)<br>Visual skills | Oral stimulation<br>Pre-feeding skills |

**Supplemental Table 2.** Total number of adverse safety events during study period

| Event                                                                         | Pre-implementation | Post-implementation |
|-------------------------------------------------------------------------------|--------------------|---------------------|
| Loss of vascular access                                                       | 0                  | 0                   |
| Dislodgement of endotracheal tube                                             | 0                  | 0                   |
| Fall                                                                          | 0                  | 0                   |
| Persistent change in vital signs requiring discontinuation of therapy session | 4                  | 2                   |
| Pressure ulcer during ICU admission                                           | 2                  | 2                   |
| Deep venous thromboembolism during ICU admission                              | 2                  | 1                   |

ICU: Intensive Care Unit

**Supplemental Figure 1.** Clinical classification category based on severity of illness for ICU-based mobility activities.

| Category | Respiratory                                                                                                                                                                                                                                                                                                                                      | Cardiac                                                                                                                                                                            | Neurological                                                                                                                                                                                                               | Goals of Care and Treatment Recommendations                                                                                                                                                                                                                     |
|----------|--------------------------------------------------------------------------------------------------------------------------------------------------------------------------------------------------------------------------------------------------------------------------------------------------------------------------------------------------|------------------------------------------------------------------------------------------------------------------------------------------------------------------------------------|----------------------------------------------------------------------------------------------------------------------------------------------------------------------------------------------------------------------------|-----------------------------------------------------------------------------------------------------------------------------------------------------------------------------------------------------------------------------------------------------------------|
| Level 1  | <ul style="list-style-type: none"> <li>Natural airway or tracheostomy without positive pressure</li> </ul>                                                                                                                                                                                                                                       | <ul style="list-style-type: none"> <li>No inotrope/pressor or antihypertensive infusions</li> </ul>                                                                                | <ul style="list-style-type: none"> <li>Baseline neuro status</li> </ul>                                                                                                                                                    | <ul style="list-style-type: none"> <li>Goals: Independence with all functional skills; minimal therapist assistance</li> <li>Education/ Passive/ IB Active / OOB Active</li> </ul>                                                                              |
| Level 2  | <ul style="list-style-type: none"> <li>High-flow/RAM cannula</li> <li>Home IMV/NIMV settings</li> <li>Weaning on IMV/NIMV support with ETT</li> <li>Continuous albuterol</li> </ul>                                                                                                                                                              | <ul style="list-style-type: none"> <li>On 1 therapy and weaning</li> <li>VAD OK</li> </ul>                                                                                         | <ul style="list-style-type: none"> <li>Stable but altered mental status (GCS 9-15)</li> <li>No ICP treatment</li> <li>Refractory status epilepticus, chronic</li> </ul>                                                    | <ul style="list-style-type: none"> <li>Goals: Towards independence with all functional skills; some therapist assistance</li> <li>Education/ Passive/ IB Active/ OOB Active</li> </ul>                                                                          |
| Level 3  | <ul style="list-style-type: none"> <li>PIP <math>\leq</math> 35</li> <li>PEEP <math>\leq</math> 8</li> <li>FiO<sub>2</sub> &lt; 0.7</li> <li>No escalation / worsening on ECMO, CRRT, HFOV, NO, prone</li> </ul>                                                                                                                                 | <ul style="list-style-type: none"> <li>On 1 or more stable therapies (not weaning)</li> <li>VAD OK</li> </ul>                                                                      | <ul style="list-style-type: none"> <li>Coma (GCS &lt;9)</li> <li>ICP &lt; 20 &amp; no or decreasing ICP treatment</li> <li>Uncontrolled agitation, pain, delirium</li> <li>Refractory status epilepticus, acute</li> </ul> | <ul style="list-style-type: none"> <li>Goals: Improve strength, endurance, and tolerance for mobility; therapist assistance required</li> <li>Education/ Passive/ IB Active/ OOB Active</li> <li>Treating ICU team to approve initial session</li> </ul>        |
| Level 4  | <ul style="list-style-type: none"> <li>New tracheostomy</li> <li>PIP &gt; 35</li> <li>PEEP &gt; 8</li> <li>FiO<sub>2</sub> &gt; 0.7</li> <li>New nitric oxide</li> <li>New prone position</li> <li>New HFOV</li> <li>O<sub>2</sub> sat &lt; 90% or &gt; 10% outside patient norm</li> <li>Unstable airway</li> <li>Open chest/abdomen</li> </ul> | <ul style="list-style-type: none"> <li>Escalating therapy</li> <li>Anti-arrhythmics</li> <li>Hypertensive crisis (systemic or pulmonary)</li> <li>Uncontrolled bleeding</li> </ul> | <ul style="list-style-type: none"> <li>New coma (GCS &lt;9)</li> <li>Intracranial hypertension (ICP &gt; 20 mmHg)</li> <li>ICU-only treatment (pentobarbital)</li> <li>Unstable fracture/spine</li> </ul>                  | <ul style="list-style-type: none"> <li>Goals: Improve &amp; maintain muscle length; positioning for skin integrity</li> <li>Education/ Passive only <u>if treating team approves (each session)</u></li> <li>No IB/OOB active treatments recommended</li> </ul> |

IB: In bed; OOB: out of bed; IMV: invasive mechanical ventilation; NIMV: non-invasive mechanical ventilation; VAD: ventricular assist device; GCS: Glasgow coma scale; ICP: intracranial pressure; PIP: Peak inspiratory pressure; PEEP: Peak end expiratory pressure; FiO<sub>2</sub>: fraction of inhaled oxygen; ECMO: extracorporeal membrane oxygenation; CRRT: continuous renal replacement therapy; HFOV: high frequency oscillatory ventilation; NO: nitric oxide; ICU: intensive care unit

## Supplemental Figure 2: Timeline of Intensive Care Unit mobility guideline development and implementation

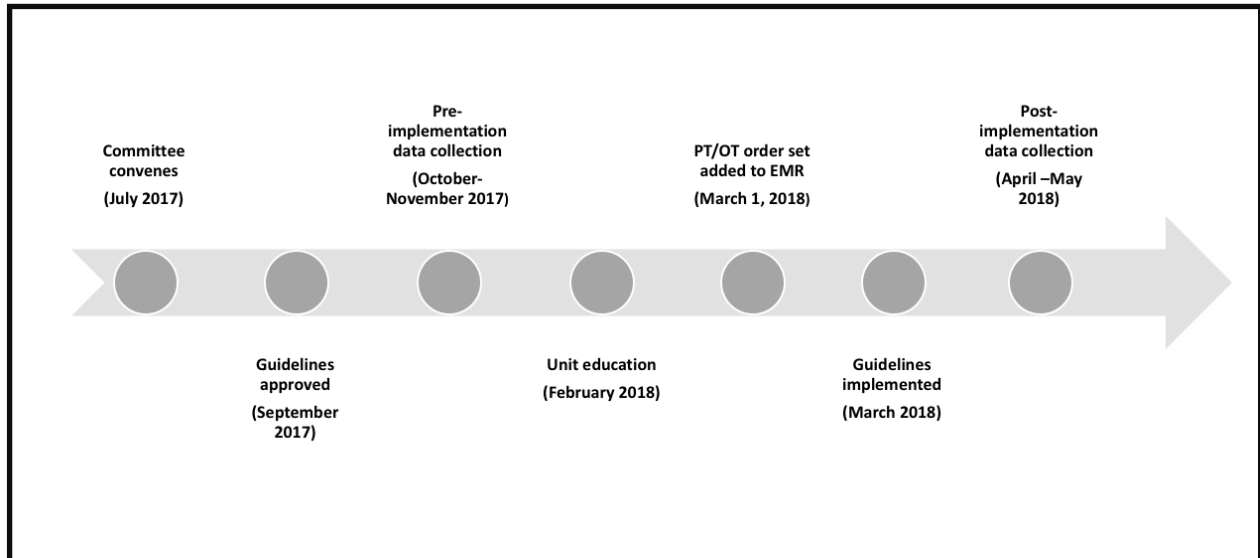

EMR: Electronic medical record
